# Supplementary material for: Recombinant apoptosis inhibitor of macrophage protein reduces delayed graft function in a murine model of kidney transplantation
Source: PubMed Central journal article supplement (PMC8064555; doi:10.1371/journal.pone.0249838), 2021-04-23
Supplement: pone.0249838.s001.pdf [file pone.0249838.s001.pdf]

# Figure 1

a)

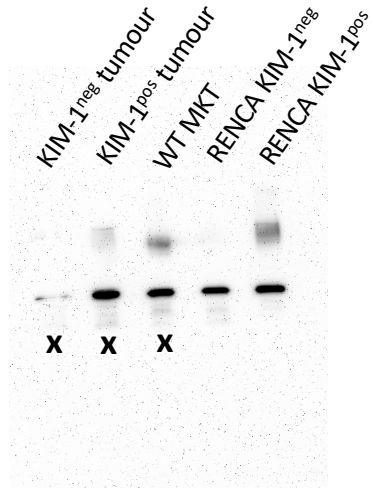

b)

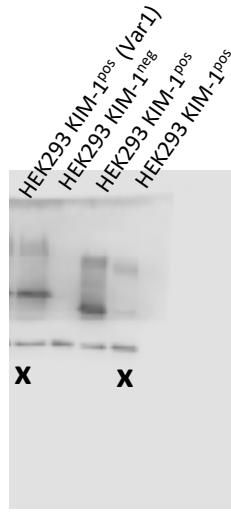

**Figure 1: Western Blots confirming KIM-1 expression.** (a) Western blot confirming KIM-1 expression on Renca cells. (b) Western blot confirming KIM-1 expression on HEK293 cells ( Includes KIM-1 variants)
