# Supplementary material for: Recombinant apoptosis inhibitor of macrophage protein reduces delayed graft function in a murine model of kidney transplantation
Source: PubMed Central journal article supplement (PMC8064555; doi:10.1371/journal.pone.0249838), 2021-04-23
Supplement: pone.0249838.s002.pdf [file pone.0249838.s002.pdf]

Figure S2

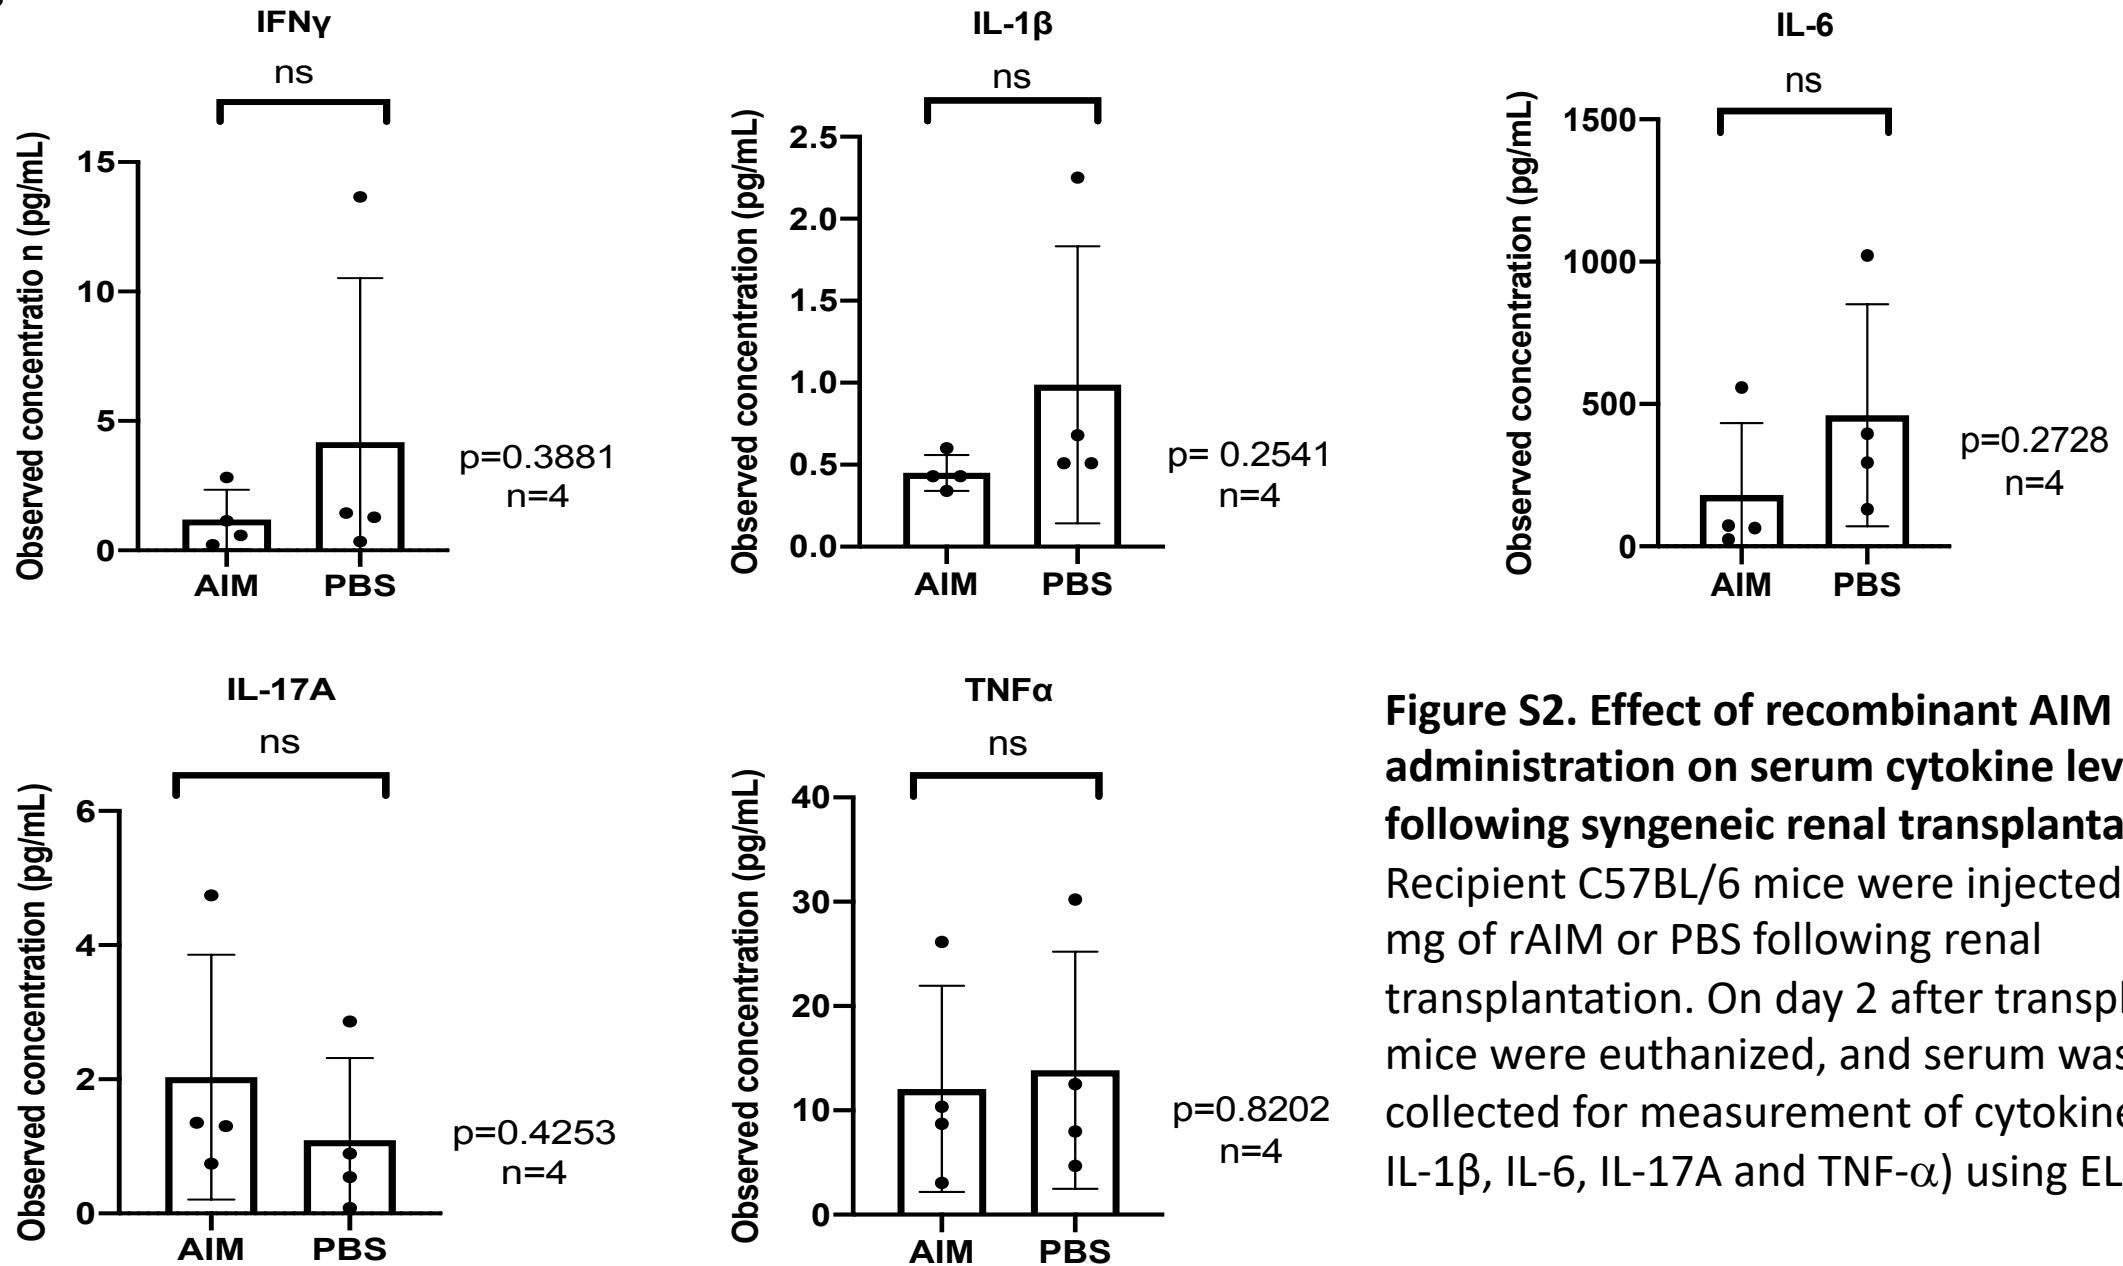

**Figure S2. Effect of recombinant AIM administration on serum cytokine levels following syngeneic renal transplantation.** Recipient C57BL/6 mice were injected i.v. with 2 mg of rAIM or PBS following renal transplantation. On day 2 after transplantation, mice were euthanized, and serum was collected for measurement of cytokines (IFN- $\gamma$ , IL-1 $\beta$ , IL-6, IL-17A and TNF- $\alpha$ ) using ELISA.
